# Supplementary material
Source: Springer Nature journal article supplement (https://www.springermedizin.de/resource/supplementary/12950_2013_347_MOESM1_ESM.pdf/9557664)

Serum 25(OH)D concentration

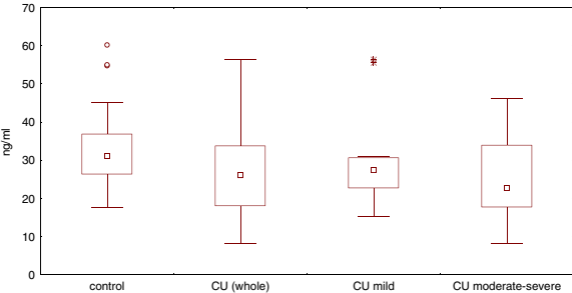

Supplement: MOESM1 [file 9557664]
